# Supplementary material for: Canadian Adolescents’ Experiences of Dating Violence: Associations with Social Power Imbalances
Source: PubMed Central journal article supplement — J Interpers Violence. 2022 May 20;38(1-2):NP1762–86. doi: 10.1177/08862605221092072 (PMC9709543; doi:10.1177/08862605221092072), 2022-05-20
Supplement: sj-pdf-1-jiv-10.1177_08862605221092072.pdf [file sj-pdf-1-jiv-10.1177_08862605221092072.pdf]

DATING VIOLENCE & POWER – SUPPLEMENTAL MATERIAL

**Supplemental Table 1**

*Use of School Bullying by Sub-Type*

| Sub-type                                   | % yes (n), total sample<br>( <i>N</i> = 3636) <sup>a</sup> |
|--------------------------------------------|------------------------------------------------------------|
| Any verbal bullying perpetration           | 36.1 (1313)                                                |
| Any social exclusion bullying perpetration | 20.4 (742)                                                 |
| Any sexual bullying perpetration           | 19.4 (707)                                                 |
| Any weight bullying perpetration           | 15.2 (554)                                                 |
| Any physical bullying perpetration         | 12.0 (438)                                                 |
| Any relational bullying perpetration       | 9.7 (352)                                                  |

<sup>a</sup>Total population in weighted sample

**Supplemental Table 2**

*Experience of School Bullying by Sub-Type*

| Sub-type                                    | % yes (n), total sample<br>(N = 3636) <sup>a</sup> |
|---------------------------------------------|----------------------------------------------------|
| Any verbal bullying victimization           | 43.2 (1570)                                        |
| Any relational bullying victimization       | 34.8 (1264)                                        |
| Any social exclusion bullying victimization | 31.2 (1136)                                        |
| Any sexual bullying victimization           | 26.3 (955)                                         |
| Any weight bullying victimization           | 20.7 (752)                                         |
| Any physical bullying victimization         | 16.9 (615)                                         |

<sup>a</sup>Total population in weighted sample

DATING VIOLENCE & POWER – SUPPLEMENTAL MATERIAL

**Supplemental Table 3**

*Fit Statistics for Varying Latent Class Models of ADV Victimization and Perpetration*

| Class    | BIC             | ABIC            | Entropy     | LCA Models                 | LMR LRT Test  | p value for LMR                 |
|----------|-----------------|-----------------|-------------|----------------------------|---------------|---------------------------------|
|          |                 |                 |             |                            | Value         | LRT                             |
| 2        | 14052.87        | 14011.56        | 0.84        | 2-class vs. 1-class        | 2856.38       | $p < .001$                      |
| <b>3</b> | <b>13639.66</b> | <b>13576.11</b> | <b>0.78</b> | <b>3-class vs. 2-class</b> | <b>462.84</b> | <b><math>p &lt; .001</math></b> |
| 4        | 13594.22        | 13508.43        | 0.83        | 4-class vs. 3-class        | 101.34        | $p = 0.31$                      |

*Note.* Solution in bold is selected model. BIC = Bayesian Information Criterion. ABIC = Sample Size Adjusted BIC. LMR LRT = Lo-Mendell-Rubin likelihood ratio test.
